# Supplementary material for: A tumour microenvironment-mediated Bi2−xMnxO3 hollow nanospheres via glutathione depletion for photothermal enhanced chemodynamic collaborative therapy
Source: Royal Society of Chemistry journal article supplement (doi:10.1039/d2tb00398h), 2022-01-01
Supplement: d2tb00398h1.pdf [file d2tb00398h1.pdf]

## Supporting information

### **A tumor microenvironment-mediated $\text{Bi}_{2-x}\text{Mn}_x\text{O}_3$ hollow nanospheres *via* glutathione depletion for photothermal enhanced chemodynamic collaborative therapy**

Xuke Ma<sup>a, b, #</sup>, Benjin Chen<sup>b, #</sup>, Haitao Wu<sup>a, #</sup>, Qianqian Jin<sup>a</sup>, Wannan Wang<sup>b</sup>, Zhengbao Zha<sup>a</sup>, Haisheng Qian<sup>\*, b, c</sup>, Yan Ma<sup>\*, b, c</sup>

<sup>a</sup> *School of Food and Biological Engineering, Hefei University of Technology, Hefei 230009, P. R. China.*

<sup>b</sup> *School of Biomedical Engineering, Research and Engineering Center of Biomedical Materials, School of Basic Medical Sciences, Anhui Medical University, Hefei 230032, P. R. China.*

<sup>c</sup> *Anhui Provincial Institute of Translational Medicine, Anhui Medical University, Hefei, Anhui 230032, P. R. China*

*# These authors contributed equally to this work.*

#### **Corresponding Author**

Prof. H. S. Qian, \*E-mail: [shqian@ahmu.edu.cn](mailto:shqian@ahmu.edu.cn)

Prof. Y. Ma, \*E-mail: [may@ahmu.edu.cn](mailto:may@ahmu.edu.cn)

**Live/Dead Cell Staining.** Typically, 4T1 cells were seeded in a 24-well plate at  $5 \times 10^4$  cells/well and then incubated with BM for 12 hours. Subsequently, the cells were irradiated with an 808 nm laser ( $1 \text{ W cm}^{-2}$ ) for 3 min. Then, calcein (AM) and propidium iodide (PI) were added for the staining of living and dead 4T1 cells and incubated to form different fluorescent substances. Digital fluorescence photographs of the cells were captured using a fluorescence microscope.

**Apoptosis.** Apoptosis quantitatively explored by flow cytometry. Usually, 4T1 cells were seeded into a 6-well plate at  $1 \times 10^5$  cells/well and then incubated with BM for 12 hours. Subsequently, the cells were irradiated with an 808 nm laser ( $1 \text{ W cm}^{-2}$ ) for 3 min. After that, the cells were digested with trypsin and stained with Annexin V-FITC/PI, and the percentage of apoptotic cells was quantitatively determined by flow cytometry analysis.

**Hydroxyl Radical ( $\cdot\text{OH}$ ) assessment.** BM ( $100 \mu\text{g mL}^{-1}$ ) was introduced to 10 mL of mixed solution containing 25 mM  $\text{NaHCO}_3$  and 0.5 mM GSH, and the solution was stirred for 15 min at  $37 \text{ }^\circ\text{C}$ . The supernatant was obtained by centrifuging the mixed solution, 8 mM  $\text{H}_2\text{O}_2$  and MB ( $20 \mu\text{g mL}^{-1}$ ) were added to the supernatant, and the solution was incubated at  $37 \text{ }^\circ\text{C}$  in the dark for 30 minutes. Then, the absorbance was measured at 665 nm to evaluate the CDT performance.

**ROS Detection by Flow Cytometry.** 4T1 cells were seeded in 6-well plates at a density of  $4 \times 10^5$  cells/well and cultured for 24 h. Then the cells were co-incubated with BM or PBS for 4 h. In particular, the cells in BM+NIR and BM+ $\text{H}_2\text{O}_2$ +NIR groups were exposed to 808 nm laser for 5 min. Then, the cells in each group were incubated with 1 mL of FBS-free RPMI 1640 medium containing DCFH-DA (1:1000) for 20 min in the dark prior. After that, the cells in each group were collected after washing with 2 mL of PBS twice, and their DCF fluorescence intensity was assessed by flow cytometry.

**Animal model.** A tumor model was established by subcutaneously injecting 4T1 cells into the backs of female BALB/c mice (4 or 6 weeks old). The mice were injected with BM when the tumor volume reached  $50\text{-}100 \text{ mm}^3$ . All animal experiments were under the guidance and approved by the Institutional Animal Care of Hefei University of Technology and Use Committee.



**Fig. S1** (a) SEM image of Bi<sub>2</sub>S<sub>3</sub> hollow nanospheres. (B) TEM image of Bi<sub>2</sub>S<sub>3</sub> hollow nanospheres.



**Fig.S2** (a) Full XPS of 1:2 BM nanospheres. (b) Full XPS of 1:3 BM nanospheres. (c) Full XPS of 1:4 BM nanospheres. (d) XPS spectra of Bi 4f. (e) XPS spectra of Mn 2p. (f) XPS spectra of O 1s.



**Fig. S3** (a) Temperature change in BM with different BM (1:2, 1:3, 1:4) under NIR laser irradiation. (b) Absorbance of MB treated with different BM (1:2, 1:3, 1:4). (c) Bar graph showing the degradation percent of MB after different BM (1:2, 1:3, 1:4) incubation. (d) Photothermal and MB degradation for different BM (1:2, 1:3, 1:4) groups.



**Fig. S4** Energy dispersive X-ray spectra of the as-prepared BM hollow nanospheres



**Fig. S5** XRD patterns of as-obtained BM



**Fig. S6** (a) Histogram of GSH consumption for different concentrations of BM dispersions. (b) GSH depletion profile with BM dispersions at various time characterized by DTNB. (c) Histogram of GSH consumption of BM dispersions at different time points. (d) Histogram of GSH consumption of BM dispersions at different temperatures.



**Fig. S7** UV-Vis-NIR absorption of MB at different time periods by BM hollow nanospheres mediated Fenton-like reaction.



**Fig. S8** The MB degradation by BM hollow nanospheres mediated Fenton-like reaction under laser irradiation with different power. (a) 1 W cm<sup>-2</sup>, (b) 1.5 W cm<sup>-2</sup>, (c) 2 W cm<sup>-2</sup>; (d) Bar graph showing the degradation percent of MB under laser irradiation with different power: (A) without laser, (B) 1 W cm<sup>-2</sup>, (C) 1.5 W cm<sup>-2</sup>, (D) 2 W cm<sup>-2</sup>



**Fig. S9** CLSM images of 4T1 cells after 4 h incubation with BM at different concentration (0, 12.5, 25, 50  $\mu\text{g mL}^{-1}$ ). Scale bar: 100  $\mu\text{m}$ .



**Fig. S10** CLSM images of 4T1 cells for GSH analysis stained by ThiolTracker™ Violet after different treatments. Scale bar: 100  $\mu\text{m}$ .



**Fig.S11** Photographs and bar graphs of 4T1 cell migration and proliferation with different treatments.



**Fig.S12** Flow cytometry analysis of intracellular ROS.



Fig. S13 Pictures of different treatment groups of mice on different days



**Fig. S14** In vivo toxicology assays of the BM NPs. (a) Blood panel analysis and (b) blood biochemistry test of healthy mice after intravenous injection of BM (10 mg kg<sup>-1</sup>) at different days. (c) H&E staining images of major organs (heart, liver, spleen, lung, kidney) of the mice after injection of BM NPs at different time points.



**Fig. 15** In vivo toxicity evaluation of different treatment groups. H&E staining images of normal organs in each group.



Table S1. Element composition of BM hollow nanospheres after the reusability test from EDX analyses.

| <b>Element</b> | <b>Weight %</b> | <b>Automic %</b> |
|----------------|-----------------|------------------|
| Mn K           | 34.97           | 28.30            |
| Bi L           | 42.48           | 9.04             |
| O K            | 22.55           | 62.66            |
| Total          | 100.00          | 100.00           |
